# Supplementary material for: Small bowel length in RYGB: Does limb length matter? Questions remain; Adapting the biliopancreatic and alimentary limb lengths to the total small bowel length in RYGB leads to better postoperative outcomes, such as quality of life, satisfaction with body weight, resolution of comorbidities and iron deficiency
Source: Research Square preprint supplement (doi:10.21203/rs.3.rs-8464981/v1), 2026-02-13
Supplement: Supplementary file 1 [file 3c8139b8b18c647e8e092f62.docx]

Table 1

**Table 1**

Patient demographics: no significant differences between patients with NS-RYGB and S-RYGB in gender and age at OP. Baseline characteristics are comparable between groups. The OP-duration is significantly longer in the NS-RYGB group.

Table 2

| SBL [cm] | CC length [cm] | BPL and AL lengths [cm] |  |
| --- | --- | --- | --- |
| <500 | >200 | ≤ 100 |  |
| 500-700 | >280 | 100 - 120 |  |
| >700 | >360 | ≥ 120 |  |

**Table 2**

Limb lengths selection of the NS-RYGB group on the basis of the SBL: small bowel length [cm] (SBL), number of patients (n), common channel length [cm], biliopancreatic limb (BPL) and alimentary limb (AL) lengths [cm]

Table 3

|  | m | sd | min | md | max | n |
| --- | --- | --- | --- | --- | --- | --- |
| SBL [cm] | 585,0 | 87,8 | 350 | 575 | 830 | 114 |
|  |  |  |  |  |  |  |

**Table 3**

NS-RYGB group: Intraoperatively measured small bowel length [cm] (SBL), mean (m), standard deviation (sd), minimum (min), median (md), maximum (max), number (n)

Table 4

**Table 4**

Changes in body weight [kg] and body mass index (BMI) [kg/m^2] pre- and 1 year post-operative in both groups. Number of cases (n), mean (m), standard deviation (sd), minimum (min), median (md), maximum (max). The postoperative weightloss outcome is comparable between both groups.

Table 5

**Table 5**

Percentages of patients with aHT, T2DM, reflux and sleep apnea preoperatively and 1 year post-operatively, compared between NS-RYGB group and S-RYGB group. The NS-RYGB group shows significant greater reductions in aHT and T2DM, while resolution of OSAS and GERD is comparable between groups.

Table 6

**Table 6**

Percentage of patients with iron deficiency, requiring hospital readmission, and requiring CT-scan/endoscopy within 1 year post-operatively. The NS-RYGB group shows significant less iron deficiency, hospital readmissions and requires less CT-scans/endoscopies.

Table 7

**Table 7**

Body weight satisfaction and quality of life (QoL) scores before and after surgery. The data shows significant better outcomes in QoL and satisfaction with body weight in the NS-RYGB group.
